# Supplementary material for: Clear cell adenocarcinoma of the lung: a population-based study
Source: PubMed Central journal article supplement — Cancer Manag Res. 2019 Jan 22;11:1003–12. doi: 10.2147/CMAR.S187370 (PMC6349083; doi:10.2147/cmar.s187370), 2019-01-22
Supplement: CMAR-11-1003-187370.pdf [file CMAR-11-1003-187370.pdf]

## Supplementary materials

**Supplementary Table S1:** Patient characteristics by surgical treatment

| Characteristics                                             | Surgery<br>(N=718) | No Surgery<br>(N=480) | P-value |
|-------------------------------------------------------------|--------------------|-----------------------|---------|
| Age                                                         | 62.0±14.6          | 70.8±13.2             | <0.01   |
| Gender                                                      |                    |                       | 0.10    |
| Female                                                      | 366                | 219                   |         |
| Male                                                        | 352                | 261                   |         |
| Ethnicity                                                   |                    |                       | 0.61    |
| White                                                       | 616                | 403                   |         |
| Black                                                       | 72                 | 55                    |         |
| Other(American Indian/AK<br>Native, Asian/Pacific Islander) | 28                 | 22                    |         |
| Unknown                                                     | 2                  | 0                     |         |
| Pathological Differentiation                                |                    |                       | <0.01   |
| Well                                                        | 29                 | 17                    |         |
| Moderate                                                    | 181                | 33                    |         |
| Poor                                                        | 333                | 124                   |         |
| Undifferentiated                                            | 42                 | 17                    |         |
| Unknown                                                     | 133                | 289                   |         |
| Laterality                                                  |                    |                       | 0.75    |
| Left                                                        | 304                | 184                   |         |
| Right                                                       | 412                | 260                   |         |
| Bilateral                                                   | 2                  | 12                    |         |
| Unknown                                                     | 0                  | 24                    |         |
| Primary Site                                                |                    |                       | <0.01   |
| Main Bronchus                                               | 0                  | 26                    |         |
| Upper Lobe, Lung                                            | 438                | 225                   |         |
| Middle Lobe, Lung                                           | 44                 | 20                    |         |
| Lower Lobe, Lung                                            | 206                | 93                    |         |
| Overlapping Lesion of Lung                                  | 15                 | 6                     |         |
| Lung, NOS                                                   | 125                | 110                   |         |

|                       |           |           |           |       |
|-----------------------|-----------|-----------|-----------|-------|
| Tumor Size            |           |           |           | <0.01 |
|                       | T1        | 237       | 31        |       |
|                       | T2        | 327       | 64        |       |
|                       | T3        | 42        | 29        |       |
|                       | T4        | 45        | 124       |       |
|                       | Unknown   | 67        | 232       |       |
| Tumor Size (mm)       |           | 36.7±21.9 | 47.7±26.1 | <0.01 |
| Lymph Node Metastases |           |           |           | <0.01 |
|                       | N0        | 483       | 86        |       |
|                       | N1        | 100       | 22        |       |
|                       | N2        | 94        | 164       |       |
|                       | N3        | 3         | 12        |       |
|                       | Unknown   | 38        | 132       |       |
| Distant Metastases    |           |           |           | <0.01 |
|                       | Yes       | 30        | 286       |       |
|                       | No        | 677       | 157       |       |
|                       | Unknown   | 11        | 37        |       |
| Summary Stage         |           |           |           | <0.01 |
|                       | Localized | 354       | 31        |       |
|                       | Regional  | 318       | 79        |       |
|                       | Distant   | 37        | 344       |       |
|                       | Unknown   | 9         | 26        |       |
| TNM Stage             |           |           |           | <0.01 |
|                       | I         | 322       | 17        |       |
|                       | II        | 87        | 6         |       |
|                       | III       | 125       | 114       |       |
|                       | IV        | 30        | 286       |       |
|                       | Unknown   | 66        | 57        |       |
| Radiation             |           |           |           | <0.01 |
|                       | Yes       | 121       | 238       |       |
|                       | No        | 582       | 232       |       |
|                       | Unknown   | 15        | 10        |       |

**Supplementary Table S2: Patient characteristics by radiation treatment**

| <b>Characteristics</b>                                      | <b>Radiation<br/>(N=359)</b> | <b>No Radiation<br/>(N=818)</b> | <b>P-value</b> |
|-------------------------------------------------------------|------------------------------|---------------------------------|----------------|
| Age                                                         | 62.4±11.1                    | 66.4±10.6                       | <0.01          |
| Gender                                                      |                              |                                 | 0.98           |
| Female                                                      | 175                          | 398                             |                |
| Male                                                        | 184                          | 420                             |                |
| Ethnicity                                                   |                              |                                 | 0.86           |
| White                                                       | 304                          | 696                             |                |
| Black                                                       | 38                           | 87                              |                |
| Other(American Indian/AK<br>Native, Asian/Pacific Islander) | 17                           | 33                              |                |
| Unknown                                                     | 0                            | 2                               |                |
| Pathological Differentiation                                |                              |                                 | <0.01          |
| Well                                                        | 12                           | 34                              |                |
| Moderate                                                    | 36                           | 174                             |                |
| Poor                                                        | 133                          | 314                             |                |
| Undifferentiated                                            | 19                           | 38                              |                |
| Unknown                                                     | 159                          | 258                             |                |
| Laterality                                                  |                              |                                 | 0.57           |
| Left                                                        | 144                          | 336                             |                |
| Right                                                       | 205                          | 453                             |                |
| Bilateral                                                   | 6                            | 8                               |                |
| Unknown                                                     | 4                            | 21                              |                |
| Primary Site                                                |                              |                                 | 0.20           |
| Main Bronchus                                               | 17                           | 10                              |                |
| Upper Lobe, Lung                                            | 211                          | 437                             |                |
| Middle Lobe, Lung                                           | 12                           | 51                              |                |
| Lower Lobe, Lung                                            | 72                           | 223                             |                |
| Overlapping Lesion of Lung                                  | 8                            | 13                              |                |
| Lung, NOS                                                   | 39                           | 84                              |                |
| Tumor Size                                                  |                              |                                 | <0.01          |
| T1                                                          | 40                           | 224                             |                |
| T2                                                          | 92                           | 289                             |                |
| T3                                                          | 31                           | 37                              |                |
| T4                                                          | 65                           | 103                             |                |
| Unknown                                                     | 131                          | 165                             |                |

|                       |           |           |           |       |
|-----------------------|-----------|-----------|-----------|-------|
| Tumor Size (mm)       |           | 46.8±24.3 | 36.9±22.3 | <0.01 |
| Lymph Node Metastases |           |           |           | <0.01 |
|                       | N0        | 81        | 481       |       |
|                       | N1        | 46        | 72        |       |
|                       | N2        | 134       | 119       |       |
|                       | N3        | 41        | 36        |       |
|                       | Unknown   | 57        | 110       |       |
| Distant Metastases    |           |           |           | <0.01 |
|                       | Yes       | 156       | 156       |       |
|                       | No        | 189       | 630       |       |
|                       | Unknown   | 14        | 32        |       |
| Summary Stage         |           |           |           | <0.01 |
|                       | Localized | 29        | 352       |       |
|                       | Regional  | 138       | 250       |       |
|                       | Distant   | 186       | 190       |       |
|                       | Unknown   | 6         | 26        |       |
| TNM Stage             |           |           |           | <0.01 |
|                       | I         | 29        | 393       |       |
|                       | II        | 34        | 56        |       |
|                       | III       | 108       | 124       |       |
|                       | IV        | 156       | 156       |       |
|                       | Unknown   | 32        | 89        |       |
| Surgery               |           |           |           | 0.87  |
|                       | Yes       | 121       | 582       |       |
|                       | No        | 238       | 232       |       |
|                       | Unknown   | 0         | 4         |       |

**Supplementary Table S3: Patient characteristics for CCAL and non-CCAL adenocarcinoma after PSM analysis**

| <b>Characteristics</b>                                      | <b>CCAL<br/>(N=787)</b> | <b>Non-CCAL<br/>(N=787)</b> | <b>P-value</b> |
|-------------------------------------------------------------|-------------------------|-----------------------------|----------------|
| Age                                                         | 66.6±9.90               | 66.7±9.94                   | 0.92           |
| Gender                                                      |                         |                             | 0.65           |
| Female                                                      | 378 (48.0%)             | 387 (48.0%)                 |                |
| Male                                                        | 409 (52.0%)             | 400 (52.0%)                 |                |
| Ethnicity                                                   |                         |                             | 0.17           |
| White                                                       | 672 (85.4%)             | 651 (82.7%)                 |                |
| Black                                                       | 80 (10.2%)              | 80 (10.2%)                  |                |
| Other(American Indian/AK<br>Native, Asian/Pacific Islander) | 35 (4.4%)               | 56 (7.1%)                   |                |
| Pathological Differentiation                                |                         |                             | 0.83           |
| Well                                                        | 25 (4.9%)               | 18 (3.6%)                   |                |
| Moderate                                                    | 155 (30.5%)             | 155 (31.4%)                 |                |
| Poor                                                        | 321(63.3%)              | 315 (63.8%)                 |                |
| Undifferentiated                                            | 6 (1.3%)                | 6 (1.2%)                    |                |
| Unknown                                                     | 280                     | 293                         |                |
| Laterality                                                  |                         |                             | 0.77           |
| Left                                                        | 301 (39.4%)             | 308 (40.4%)                 |                |
| Right                                                       | 459 (59.7%)             | 446 (58.5%)                 |                |
| Bilateral                                                   | 9 (10.9%)               | 9 (1.1%)                    |                |
| Unknown                                                     | 18                      | 24                          |                |
| Primary Site                                                |                         |                             | 0.87           |
| Main Bronchus                                               | 14 (2.0%)               | 18 (26.1%)                  |                |
| Upper Lobe, Lung                                            | 461 (65.6%)             | 453(65.6%)                  |                |
| Middle Lobe, Lung                                           | 38 (5.4%)               | 35 (5.1%)                   |                |
| Lower Lobe, Lung                                            | 186 (26.5%)             | 181 (4.8%)                  |                |
| Overlapping Lesion of Lung                                  | 4 (0.5%)                | 3 (0.4%)                    |                |
| Lung, NOS                                                   | 84                      | 97                          |                |
| Tumor Size (mm)                                             | 38.9±23.3               | 39.7±23.0                   | 0.61           |
| Tumor Size                                                  |                         |                             | 0.98           |
| T1                                                          | 216 (35.0%)             | 214 (34.9%)                 |                |
| T2                                                          | 260 (42.0%)             | 254 (42.1%)                 |                |
| T3                                                          | 40 (6.5%)               | 37 (6.5%)                   |                |
| T4                                                          | 102 (16.5%)             | 108 (16.5%)                 |                |
| Unknown                                                     | 169                     | 174                         |                |

|                       |           |             |             |      |
|-----------------------|-----------|-------------|-------------|------|
| Lymph Node Metastases |           |             |             | 0.99 |
|                       | N0        | 418 (60.3%) | 419 (60.8%) |      |
|                       | N1        | 58 (8.4%)   | 60 (4.9%)   |      |
|                       | N2        | 172 (24.8%) | 167 (24.2%) |      |
|                       | N3        | 45 (6.5%)   | 43 (6.2%)   |      |
|                       | Unknown   | 94          | 98          |      |
| Distant Metastases    |           |             |             | 0.42 |
|                       | Yes       | 224 (29.3%) | 237 (30.7%) |      |
|                       | No        | 541 (70.7%) | 535 (69.3%) |      |
|                       | Unknown   | 22          | 15          |      |
| Summary Stage         |           |             |             | 0.46 |
|                       | Localized | 285 (37.2%) | 291 (37.6%) |      |
|                       | Regional  | 217 (28.3%) | 201 (26.0%) |      |
|                       | Distant   | 264 (34.5%) | 281 (36.4%) |      |
|                       | Unknown   | 21          | 14          |      |
| TNM Stage             |           |             |             | 0.89 |
|                       | I         | 341 (45.7%) | 341 (45.2%) |      |
|                       | II        | 50 (6.7%)   | 47 (6.2%)   |      |
|                       | III       | 131 (17.6%) | 130 (17.2%) |      |
|                       | IV        | 224 (30.0%) | 237 (31.4%) |      |
|                       | Unknown   | 41          | 32          |      |
| Surgery               |           |             |             | 0.58 |
|                       | No        | 323 (41.1%) | 316 (40.3%) |      |
|                       | Yes       | 463 (58.9%) | 468 (59.7%) |      |
|                       | Unknown   | 1           | 3           |      |
| Radiation             |           |             |             | 0.87 |
|                       | Yes       | 571 (72.6%) | 582 (74.3%) |      |
|                       | No        | 215 (27.4%) | 201 (25.7%) |      |
|                       | Unknown   | 1           | 4           |      |

**Supplementary Table S4:** Patient characteristics for CCAL patients with or without radiotherapy after PSM analysis

| <b>Characteristics</b>                                      | <b>Radiation<br/>(N=220)</b> | <b>Non- Radiation<br/>(N=220)</b> | <b>P-value</b> |
|-------------------------------------------------------------|------------------------------|-----------------------------------|----------------|
| Age                                                         | 63.7±11.3                    | 64.0±11.1                         | 0.78           |
| Gender                                                      |                              |                                   | 0.51           |
| Female                                                      | 95                           | 97                                |                |
| Male                                                        | 125                          | 123                               |                |
| Ethnicity                                                   |                              |                                   | 0.23           |
| White                                                       | 185                          | 179                               |                |
| Black                                                       | 26                           | 33                                |                |
| Other(American Indian/AK<br>Native, Asian/Pacific Islander) | 9                            | 8                                 |                |
| Unknown                                                     | 0                            | 0                                 |                |
| Pathological Differentiation                                |                              |                                   | 0.91           |
| Well                                                        | 7                            | 6                                 |                |
| Moderate                                                    | 23                           | 32                                |                |
| Poor                                                        | 89                           | 83                                |                |
| Undifferentiated                                            | 13                           | 7                                 |                |
| Unknown                                                     | 88                           | 92                                |                |
| Laterality                                                  |                              |                                   | 0.44           |
| Left                                                        | 95                           | 89                                |                |
| Right                                                       | 123                          | 121                               |                |
| Bilateral                                                   | 1                            | 3                                 |                |
| Unknown                                                     | 1                            | 7                                 |                |
| Primary Site                                                |                              |                                   | 0.20           |
| Main Bronchus                                               | 6                            | 5                                 |                |
| Upper Lobe, lung                                            | 136                          | 116                               |                |
| Middle Lobe, lung                                           | 5                            | 9                                 |                |
| Lower Lobe, lung                                            | 50                           | 56                                |                |
| Overlapping lesion of lung                                  | 5                            | 3                                 |                |
| Lung, NOS                                                   | 18                           | 31                                |                |
| Tumor Size                                                  |                              |                                   | 0.29           |
| T1                                                          | 28                           | 26                                |                |
| T2                                                          | 62                           | 53                                |                |
| T3                                                          | 23                           | 22                                |                |
| T4                                                          | 34                           | 59                                |                |
| Unknown                                                     | 73                           | 60                                |                |
| Tumor Size (mm)                                             | 44.2±24.4                    | 45.5±25.7                         | 0.62           |

|                       |           |     |     |      |
|-----------------------|-----------|-----|-----|------|
| Lymph Node Metastases |           |     |     | 0.49 |
|                       | N0        | 42  | 46  |      |
|                       | N1        | 41  | 44  |      |
|                       | N2        | 82  | 74  |      |
|                       | N3        | 21  | 24  |      |
|                       | Unknown   | 34  | 32  |      |
| Distant Metastases    |           |     |     | 0.27 |
|                       | Yes       | 87  | 90  |      |
|                       | No        | 127 | 124 |      |
|                       | Unknown   | 6   | 6   |      |
| Summary Stage         |           |     |     | 0.87 |
|                       | Localized | 17  | 17  |      |
|                       | Regional  | 99  | 95  |      |
|                       | Distant   | 101 | 105 |      |
|                       | Unknown   | 3   | 3   |      |
| TNM Stage             |           |     |     | 0.65 |
|                       | I         | 12  | 13  |      |
|                       | II        | 31  | 35  |      |
|                       | III       | 71  | 67  |      |
|                       | IV        | 87  | 90  |      |
|                       | Unknown   | 19  | 15  |      |
| Surgery               |           |     |     | 0.87 |
|                       | Yes       | 100 | 96  |      |
|                       | No        | 220 | 124 |      |
|                       | Unknown   | 0   | 0   |      |



**Supplementary Table S5: Patient characteristics for CCAL patients with or without radiotherapy after surgery after PSM analysis**

| <b>Characteristics</b>                                      | <b>Radiation<br/>(N=107)</b> | <b>Non-Radiation<br/>(N=107)</b> | <b>p-value</b> |
|-------------------------------------------------------------|------------------------------|----------------------------------|----------------|
| Age                                                         | 60.6±9.60                    | 62.7±10.9                        | 0.13           |
| Gender                                                      |                              |                                  | 0.41           |
| Female                                                      | 57                           | 51                               |                |
| Male                                                        | 50                           | 56                               |                |
| Ethnicity                                                   |                              |                                  | 0.52           |
| White                                                       | 94                           | 92                               |                |
| Black                                                       | 8                            | 12                               |                |
| Other(American Indian/AK<br>Native, Asian/Pacific Islander) | 5                            | 3                                |                |
| Unknown                                                     | 0                            | 0                                |                |
| Pathological Differentiation                                |                              |                                  | 0.85           |
| Well                                                        | 4                            | 2                                |                |
| Moderate                                                    | 21                           | 23                               |                |
| Poor                                                        | 55                           | 59                               |                |
| Undifferentiated                                            | 8                            | 8                                |                |
| Unknown                                                     | 19                           | 15                               |                |
| Laterality                                                  |                              |                                  | 0.44           |
| Left                                                        | 42                           | 44                               |                |
| Right                                                       | 64                           | 63                               |                |
| Bilateral                                                   | 1                            | 0                                |                |
| Unknown                                                     | 0                            | 0                                |                |
| Primary Site                                                |                              |                                  | 0.35           |
| Main Bronchus                                               | 0                            | 0                                |                |
| Upper Lobe, Lung                                            | 73                           | 61                               |                |
| Middle Lobe, Lung                                           | 3                            | 8                                |                |
| Lower Lobe, Lung                                            | 25                           | 30                               |                |
| Overlapping Lesion of Lung                                  | 4                            | 4                                |                |
| Lung, NOS                                                   | 2                            | 4                                |                |
| Tumor Size                                                  |                              |                                  | 0.38           |
| T1                                                          | 20                           | 19                               |                |
| T2                                                          | 49                           | 46                               |                |
| T3                                                          | 13                           | 13                               |                |
| T4                                                          | 8                            | 17                               |                |
| Unknown                                                     | 17                           | 12                               |                |

|                       |           |           |           |      |
|-----------------------|-----------|-----------|-----------|------|
| Tumor Size (mm)       |           | 41.8±21.3 | 45.4±24.1 | 0.26 |
| Lymph Node Metastases |           |           |           | 0.59 |
|                       | N0        | 30        | 25        |      |
|                       | N1        | 34        | 43        |      |
|                       | N2        | 36        | 32        |      |
|                       | N3        | 0         | 1         |      |
|                       | Unknown   | 7         | 6         |      |
| Distant Metastases    |           |           |           | 0.93 |
|                       | Yes       | 8         | 8         |      |
|                       | No        | 95        | 96        |      |
|                       | Unknown   | 4         | 3         |      |
| Summary Stage         |           |           |           | 0.96 |
|                       | Localized | 14        | 15        |      |
|                       | Regional  | 81        | 78        |      |
|                       | Distant   | 9         | 11        |      |
|                       | Unknown   | 3         | 3         |      |
| TNM Stage             |           |           |           | 0.89 |
|                       | I         | 16        | 15        |      |
|                       | II        | 29        | 36        |      |
|                       | III       | 42        | 37        |      |
|                       | IV        | 8         | 8         |      |
|                       | Unknown   | 12        | 11        |      |

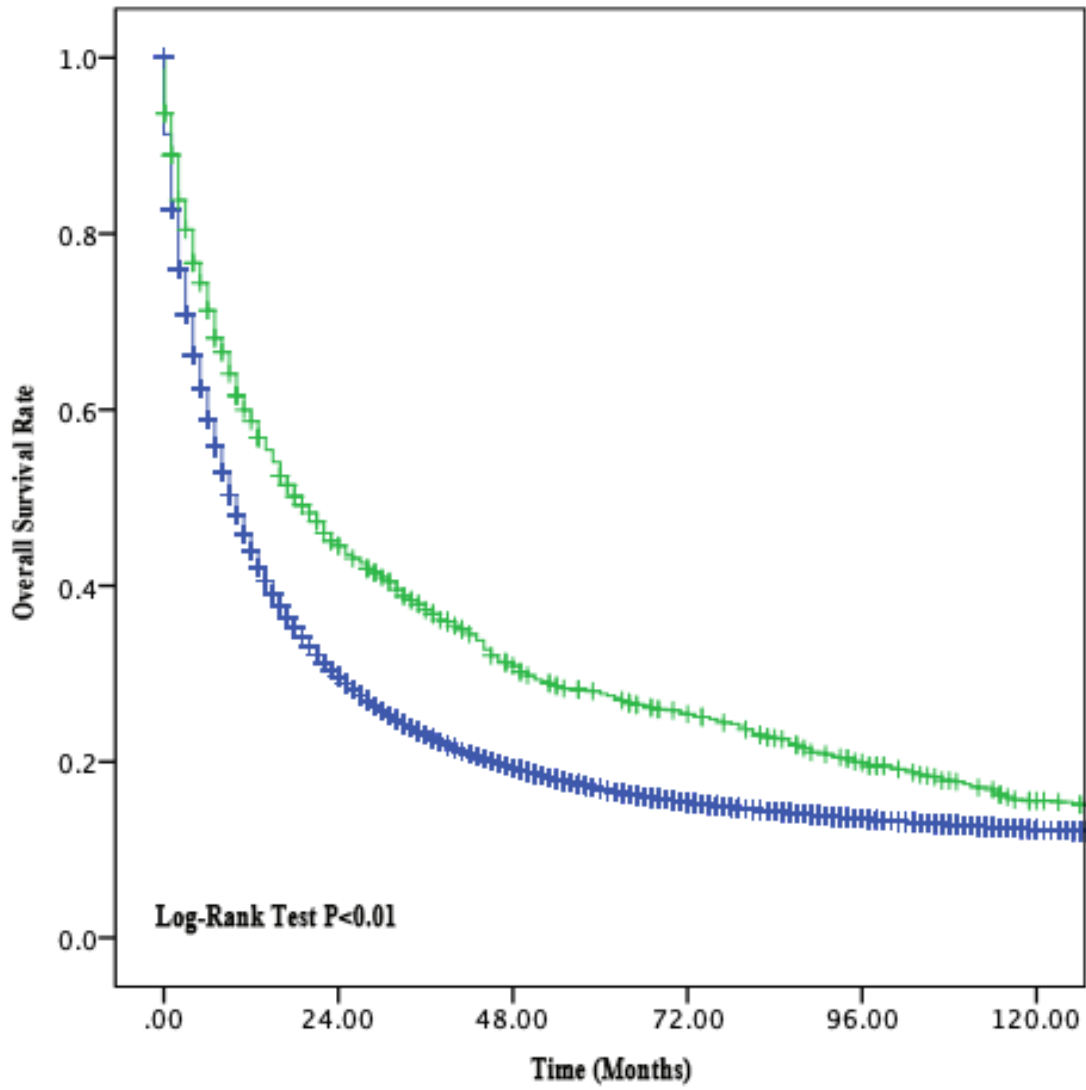

**Figure S1** OS for CCAL patients and lung adenocarcinoma patients in unmatched cohort.

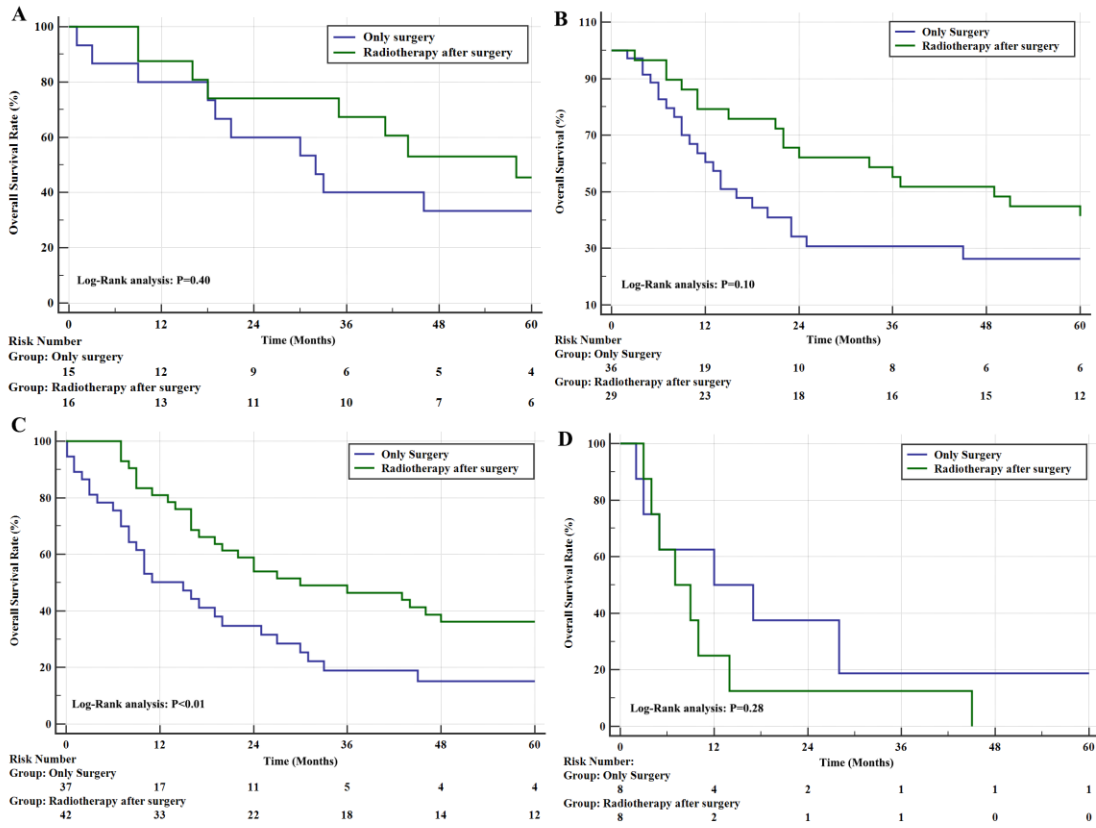

**Figure S2** OS for CCAL patients with/without radiotherapy after surgery (A:I stage, B: II stage, C: III stage, D: IV stage).

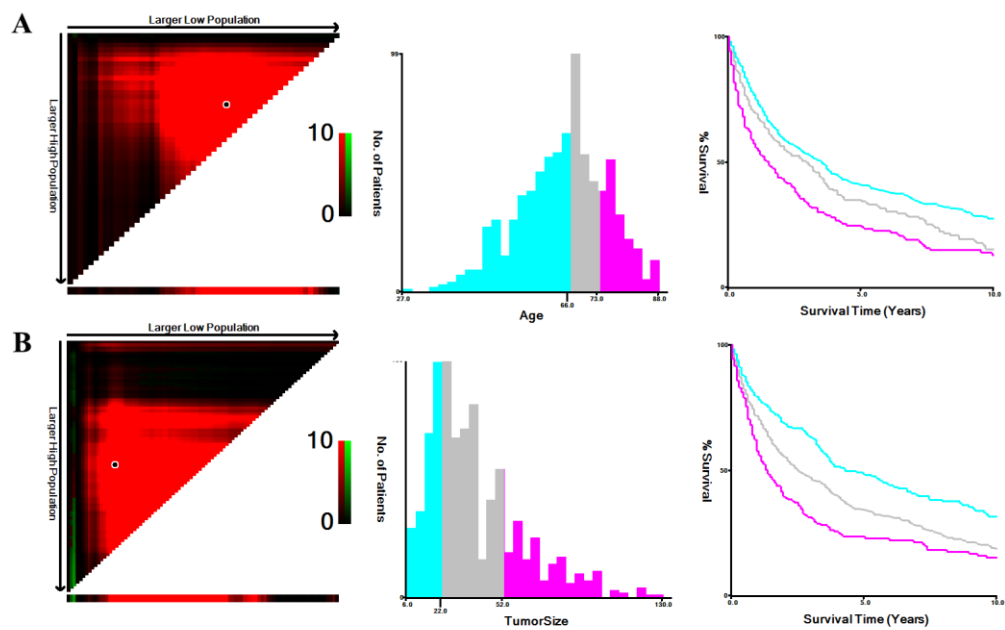

**Figure S3** The optimal cut-off of Age (A) and tumor size (B) in CCAL patients using X-tile software. The optimal cut-point of Age and tumor size is shown on the histogram and corresponding population are presented on the Kaplan-Meier curve.

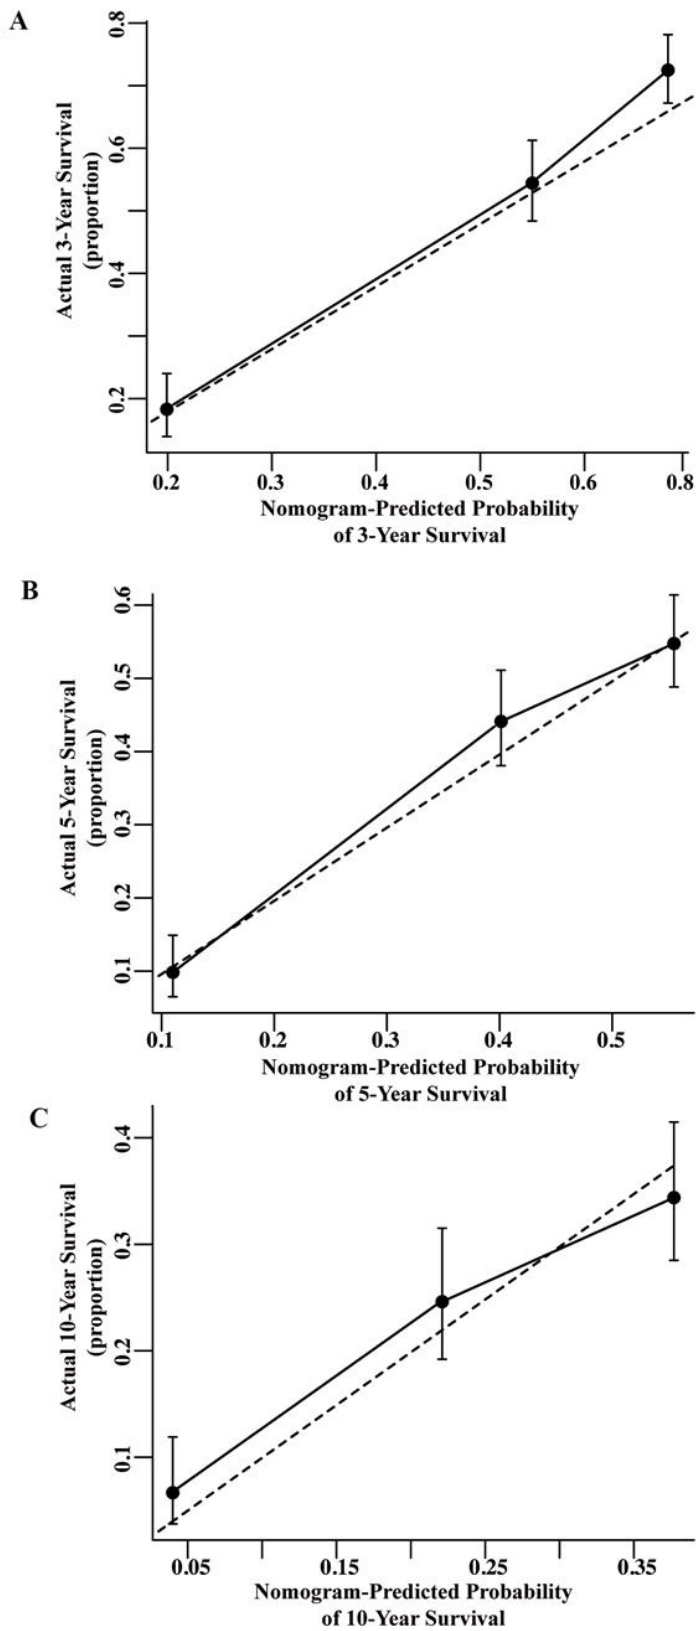

**Figure S4** The calibration curve for predicting CCAL patients survival at (A) 3 years and (B) 5 years, and (C) 10 years in the primary cohort. Nomogram-predicted probability of overall survival is plotted on the X-axis, actual overall survival is plotted on the Y-axis.
